# Supplementary material
Source: Frontiers journal article supplement (https://www.frontiersin.org/articles/409715)
Supplement: Data_Sheet_2.PDF [file Data_Sheet_2.PDF]

**Supplementary figure: robustness against the normalization of Ki values procedure**

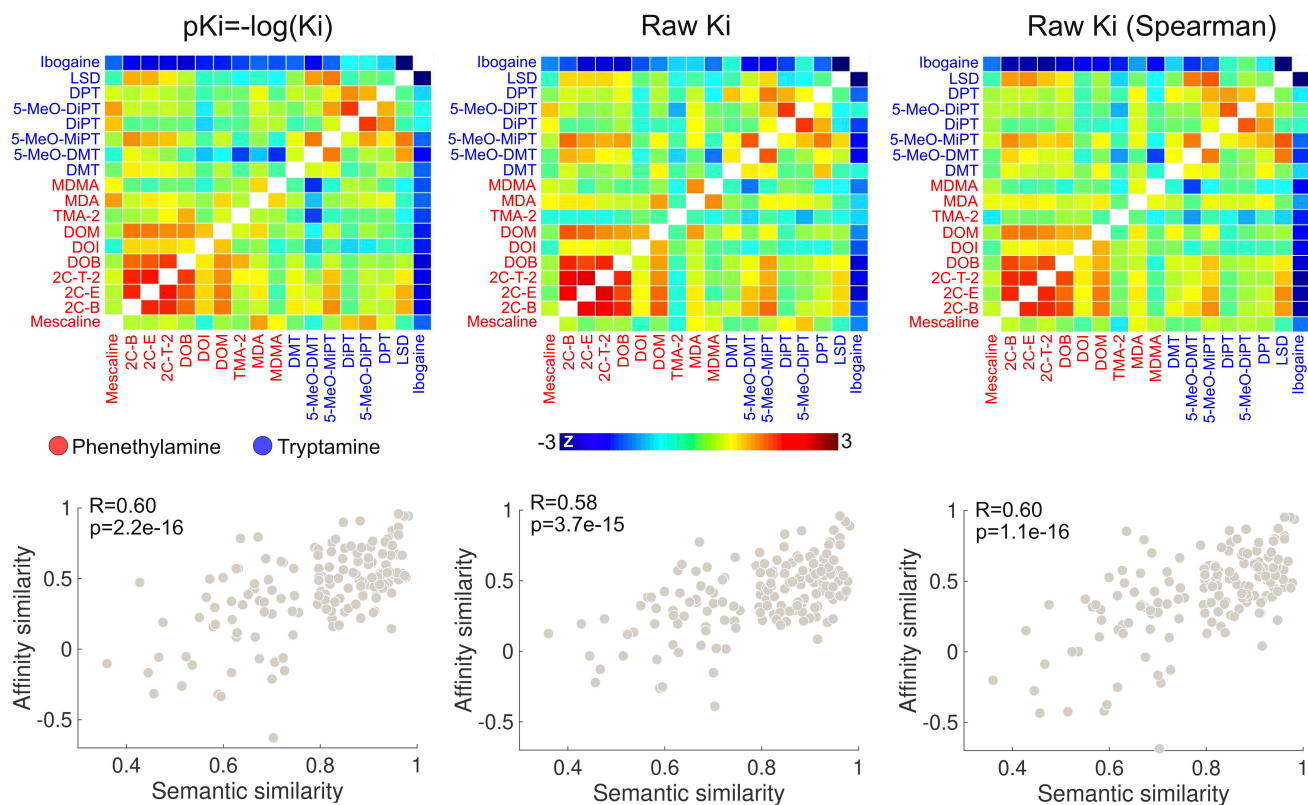

**Figure S1:** The upper panel (left) shows the affinity similarity matrices obtained from the pKi values (as defined in the manuscript text, thus concordant with the results shown in **Figure 4** of the manuscript), from the raw (i.e. unnormalized) Ki values (middle), and from the raw Ki values using Spearman’s correlation instead of Pearson’s correlation to compare the affinity profiles (right). The bottom panel presents scatter plots for the affinity similarities (computed using each of the three normalization procedures) and the semantic similarities. In all cases, we observed  $R \approx 0.6$  with a highly significant p-value.
